# Supplementary material for: Phase stabilization of red-emitting olivine-type NaMgPO4:Eu2+phosphorsviamolten-phase quenching
Source: Royal Society of Chemistry journal article supplement (doi:10.1039/d0qi00880j), 2020-01-01
Supplement: d0qi00880j2.pdf [file d0qi00880j2.pdf]

Electronic Supplementary Information for:

**Phase stabilization of red-emitting olivine-type  $\text{NaMgPO}_4:\text{Eu}^{2+}$  phosphors via molten-phase quenching**

Takuya Hasegawa,<sup>1\*</sup> Masato Iwaki,<sup>2</sup> Ryo Tanaka,<sup>2</sup> Sun-woog Kim,<sup>2,3\*</sup> Shu Yin,<sup>1</sup> Kenji Toda<sup>2\*</sup>

<sup>1</sup>*Institute of Multidisciplinary Research for Advanced Material (IMRAM), Tohoku University, 2-1-1 Katahira, Aoba-ku, Sendai, 980-8577, Japan*

<sup>2</sup>*Graduate School of Science and Technology, Niigata University, 8050 Ikarashi 2-nocho, Niigata 950-2181, Japan*

<sup>3</sup>*Electronic Convergence Materials Division, Optic and Display Materials Center, Korea Institute of Ceramic Engineering and Technology, 101 Soho-ro, Jinju-si, Republic of Korea*

**Keywords:**  *$\text{Eu}^{2+}$ -doped phosphor, Red emission, phosphor, pc-WLED, Phase stabilization, Molten-phase quenching process*

\*Corresponding authors

Assistant Professor Dr. Takuya Hasegawa

Tel +81-22-217-5599, E-mail: [hase@tohoku.ac.jp](mailto:hase@tohoku.ac.jp)

Dr. Sun-woog Kim

Tel +82-55-792-2487, E-mail: [skim80@kicet.re.kr](mailto:skim80@kicet.re.kr)

Research Professor Dr. Kenji Toda

Tel/Fax +81-25-262-6771, E-mail: [ktoda@eng.niigata-u.ac.jp](mailto:ktoda@eng.niigata-u.ac.jp)

## Content

1. Figure S1 Results of the Rietveld analysis of the  $\text{NMP:}_{0.025}\text{Eu}$ -arc phosphor.
2. Table S1 Details of the Rietveld refinement of the olivine-type  $\text{NMP:}_{0.025}\text{Eu}$ -arc phosphor.
3. Figure S2 Schematic illustration of the experimental procedure for the humidity resistance test.
4. Figure S3 (left) XRD patterns of the  $\text{NMP:}_{0.030}\text{Eu}^{2+}$  phosphors synthesized by the conventional solid-state reaction method *via* a normal cooling process using alumina and carbon boats and *via* a molten-phase quenching route using an alumina boat. (right) Photographs of these phosphors irradiated by 365 nm black light.
5. Figure S4 (A) TG and (B) all-range DTA curves measured under the same conditions as in Figure 1A for the preheated precursor of the  $\text{NMP:}_{0.030}\text{Eu}^{2+}$  phosphor.
6. Table S2 Details of the Rietveld refinement of the olivine type  $\text{NMP:}_x\text{Eu}^{2+}\text{-MPQ}$  ( $x=0\text{-}0.100$ ) phosphors.
7. Figure S5 Lattice constants, (A)  $a$ , (B)  $b$  and (C)  $c$ , and (D) volume of the olivine-type  $\text{NMP:}_x\text{Eu}^{2+}\text{-MPQ}$  ( $x=0\text{-}0.100$ ) phosphors.
8. Figure S6 Dependence of the BVS values of the Na (4a) and Mg (4c) sites on the  $\text{Eu}^{2+}$  concentration in the olivine-type  $\text{NMP:Eu}^{2+}\text{-MPQ}$  phosphor.
9. Table S3 Mean bond length of the  $\text{NMP:}_{0.030}\text{Eu}$ -MPQ phosphor.
10. Figure S7 XPS spectra for (a)  $\text{NMP:}_{0.030}\text{Eu}^{2+}\text{-MPQ}$  and (b)  $\text{NMP:Eu}_{0.025}\text{-arc}$  phosphors: survey, Na1s, Mg2p, P2p and O1s.
11. Table S4 Chemical analysis based on the XPS results for the  $\text{NMP:}_{0.030}\text{Eu}^{2+}\text{-MPQ}$  and  $\text{NMP:}_{0.025}\text{Eu}$ -arc phosphors.
12. Figure S8 FE-SEM image of the olivine-type  $\text{NMP:}_{0.025}\text{Eu}$ -arc phosphor.
13. Figure S9 Plot of the Kubelka-Munk function for the NMP host.
14. Figure S10 Photographs of the non-excited  $\text{NMP:}_x\text{Eu}^{2+}\text{-MPQ}$  ( $x=0.010\text{-}0.050$ ) and  $\text{NMP:}_{0.025}\text{Eu}$ -arc phosphors (under fluorescent lamps).
15. Figure S11 (A) PL and PLE spectra and (B) plot of the PL intensity for  $\text{NMP:}_x\text{Eu}^{2+}\text{-MPQ}$  ( $x=0.010\text{-}0.050$ ) phosphors.
16. Figure S12 PL decay curves for the  $\text{NMP:}_{0.030}\text{Eu}^{2+}\text{-MPQ}$  phosphors before and after the humidity test.

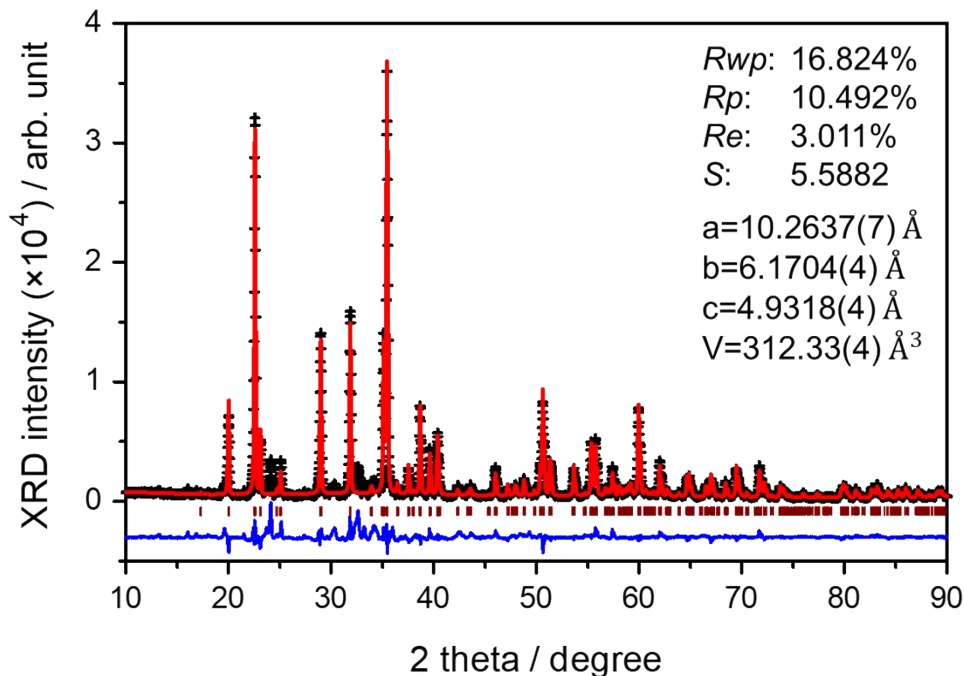

**Figure S1** Results of the Rietveld analysis of the NMP:<sub>0.025</sub>Eu-arc phosphor.

**Table S1** Details of the Rietveld refinement of the olivine-type NMP:<sub>0.025</sub>Eu-arc phosphor.

| Atom    | Wyckoff | Occ. <sup>a</sup> | x         | y         | z          | $U_{iso}$ . <sup>b</sup> (Å <sup>2</sup> ) | BVS <sup>c</sup> |
|---------|---------|-------------------|-----------|-----------|------------|--------------------------------------------|------------------|
| Na1/Eu1 | 4a      | 1                 | 0         | 0         | 0          | 0.5(1)                                     | 1.41(6)          |
| Mg1     | 4c      | 1                 | 0.2820(4) | 0.25      | 0.9933(9)  | 0.1(1)                                     | 1.83(6)          |
| P1      | 4c      | 1                 | 0.1093(4) | 0.25      | 0.4439(7)  | 0.3(1)                                     | 4.9(1)           |
| O1      | 4c      | 1                 | 0.1202(8) | 0.25      | 0.750(1)   | 0.407                                      | 2.2(2)           |
| O2      | 4c      | 1                 | 0.4642(8) | 0.25      | 0.154(1)   | 0.4(2)                                     | 2.20(4)          |
| O3      | 8d      | 1                 | 0.1747(6) | 0.0542(7) | 0.3039(10) | 0.6(2)                                     | 2.14(4)          |

<sup>a</sup> Occ. means atomic occupancy; <sup>b</sup> isotropic temperature factors; <sup>c</sup> bond valence sum

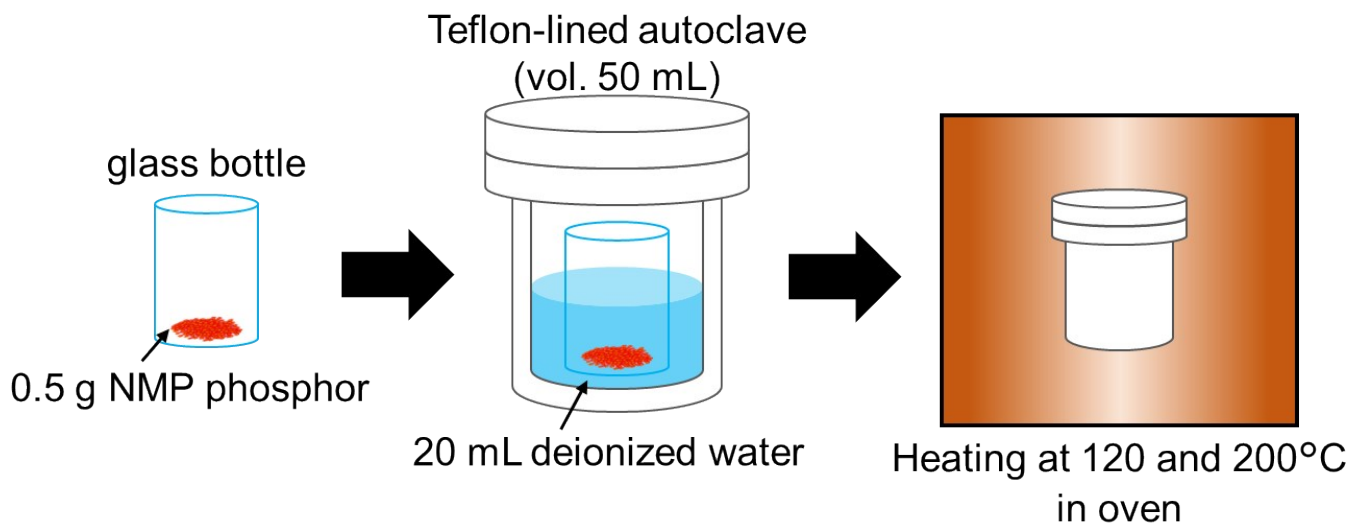

**Figure S2** Schematic illustration of the experimental procedure for the humidity resistance test.

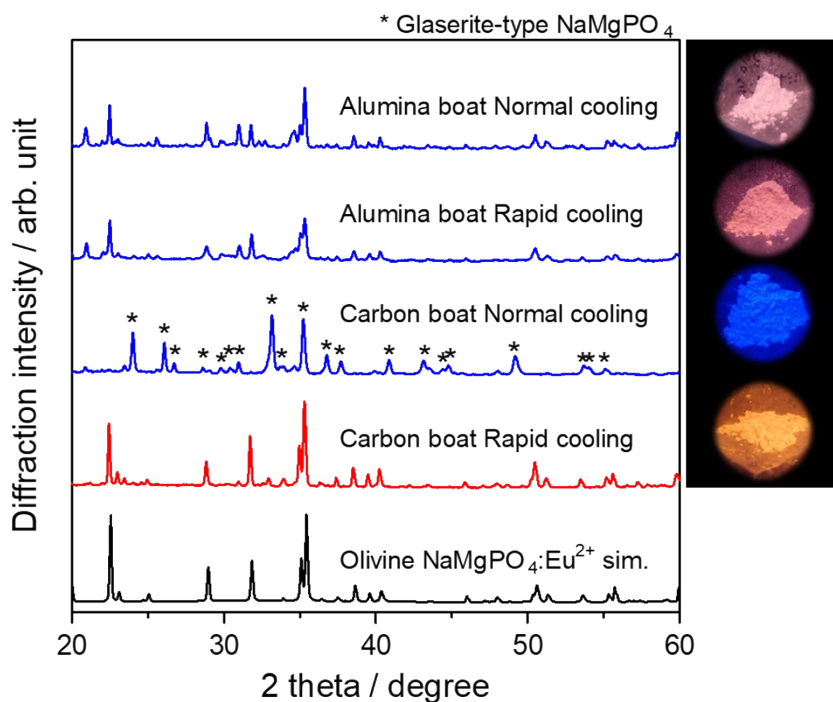

**Figure S3** (left) XRD patterns of the  $\text{NMP:}_{0.030}\text{Eu}^{2+}$  phosphors synthesized by the conventional solid-state reaction method *via* a normal cooling process using alumina and carbon boats and *via* a molten-phase quenching route using an alumina boat. (right) Photographs of these phosphors irradiated by 365 nm black light.

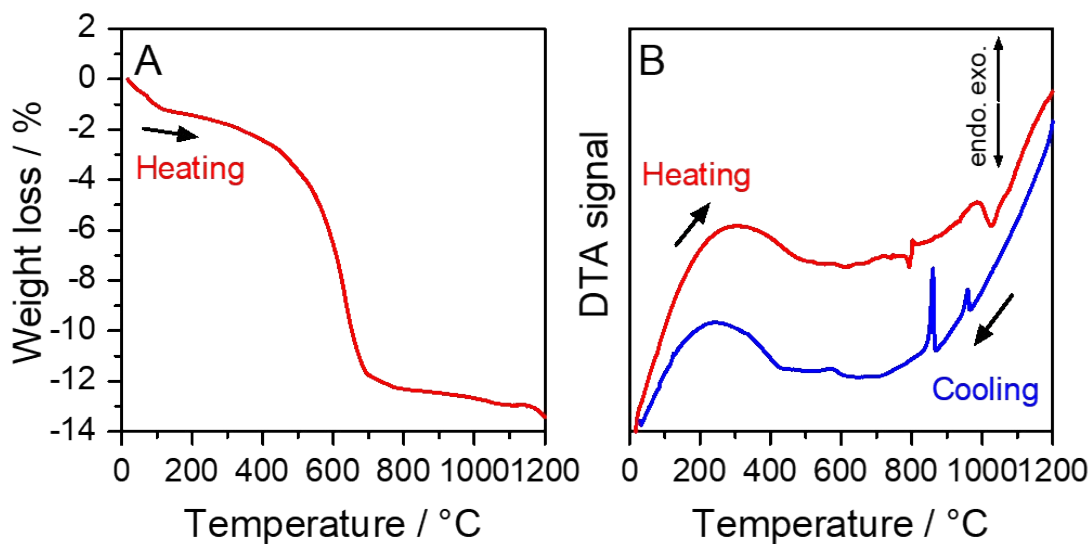

**Figure S4** (A) TG and (B) all-range DTA curves measured under the same conditions as in Figure 1A for the preheated precursor of the NMP:Eu<sup>2+</sup> phosphor.

**Table S2** Details of the Rietveld refinement of the olivine-type NMP;<sub>x</sub>Eu<sup>2+</sup>-MPQ (x=0-0.100) phosphors.

| $x$   | $R_{wp}$ (%) | $R_p$ (%) | $R_e$ (%) | $S$    |
|-------|--------------|-----------|-----------|--------|
| 0     | 17.419       | 10.874    | 3.679     | 4.7343 |
| 0.01  | 11.311       | 7.848     | 3.492     | 3.2388 |
| 0.02  | 10.918       | 7.314     | 3.406     | 3.2057 |
| 0.025 | 10.675       | 6.826     | 3.333     | 3.2024 |
| 0.03  | 10.212       | 6.247     | 3.225     | 3.1666 |
| 0.04  | 10.377       | 6.353     | 3.086     | 3.3625 |
| 0.05  | 13.104       | 8.123     | 3.027     | 4.3285 |
| 0.06  | 14.381       | 8.966     | 2.927     | 4.9136 |
| 0.08  | 15.285       | 8.84      | 2.831     | 5.3984 |
| 0.1   | 15.205       | 9.253     | 2.739     | 5.5503 |

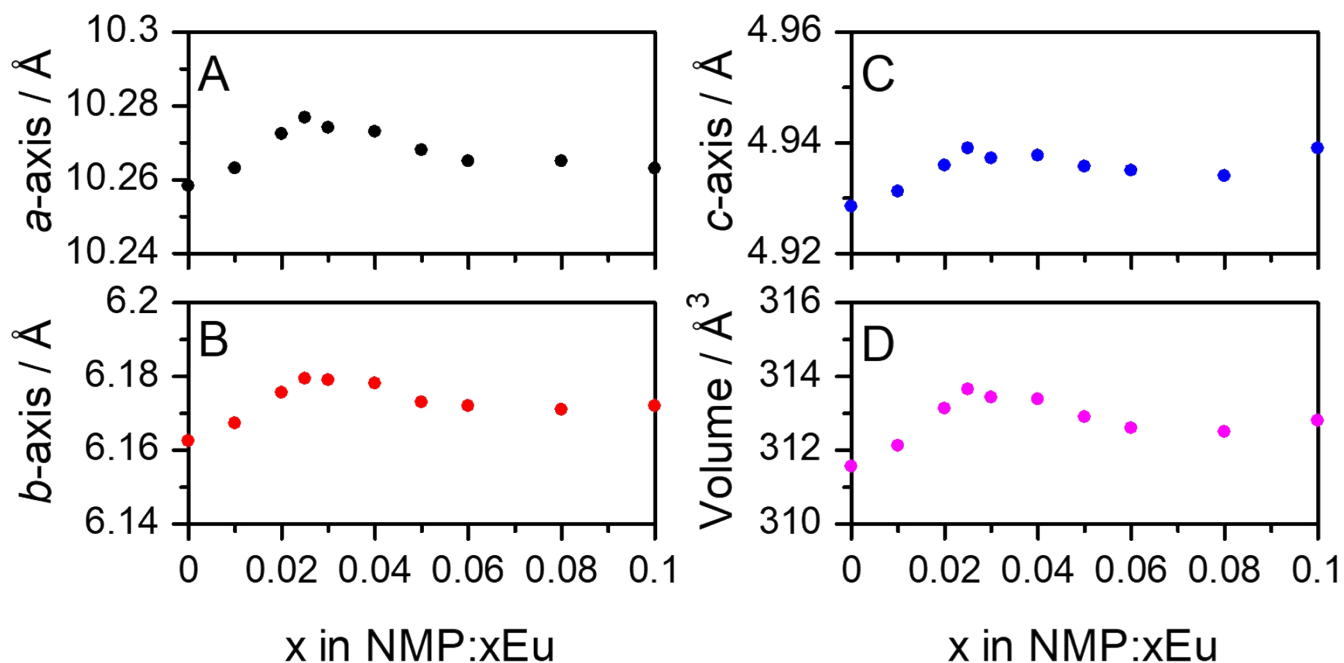

**Figure S5** Lattice constants, (A)  $a$ , (B)  $b$  and (C)  $c$ , and (D) volume of the olivine-type NMP: $x$ Eu<sup>2+</sup>-MPQ ( $x=0-0.100$ ) phosphors.

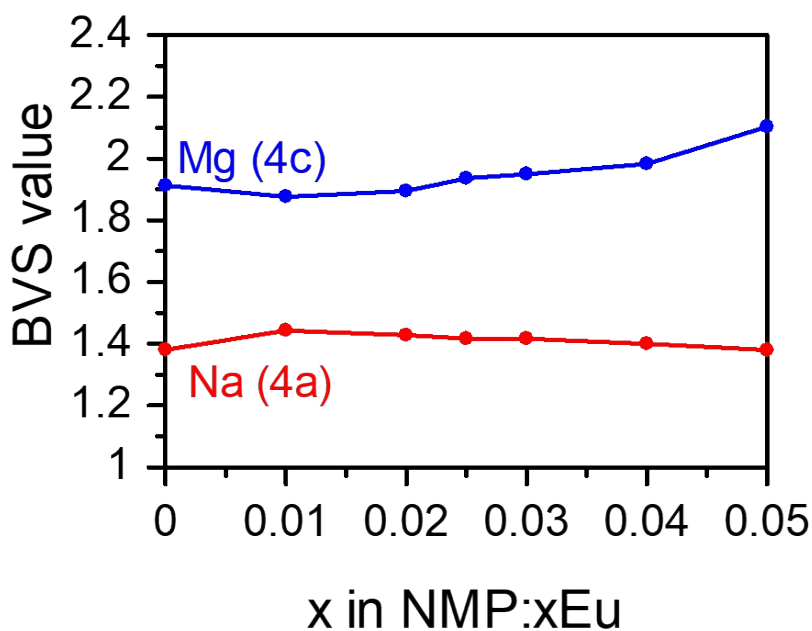

**Figure S6** Dependence of the BVS values of the Na (4a) and Mg (4c) sites on the Eu<sup>2+</sup> concentration in the olivine-type NMP:Eu<sup>2+</sup>-MPQ phosphor.

**Table S3** Mean bond length of the NMP:<sub>0.030</sub>Eu-MPQ phosphor.

| Cation  | Anion | Bond length (Å) |
|---------|-------|-----------------|
| Na1     | O1×2  | 2.341(6)        |
|         | O2×2  | 2.332(5)        |
|         | O3×2  | 2.371(5)        |
| Average |       | 2.348           |
| Mg1     | O1    | 2.026(9)        |
|         | O2    | 2.003(9)        |
|         | O3×2  | 2.238(6)        |
|         | O3×2  | 2.150(5)        |
| Average |       | 2.134           |
| P1      | O1    | 1.544(7)        |
|         | O2    | 1.593(9)        |
|         | O3×2  | 1.535(5)        |
| Average |       | 1.552           |

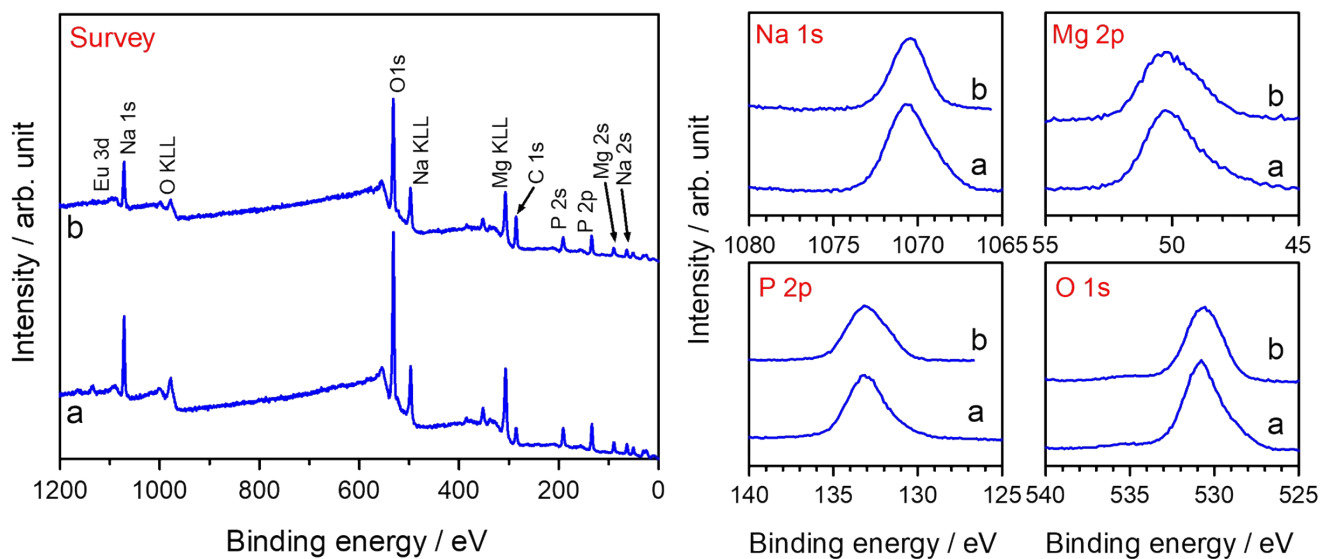**Figure S7** XPS spectra for (a) NMP:<sub>0.030</sub>Eu<sup>2+</sup>-MPQ and (b) NMP:Eu<sub>0.025</sub>-arc phosphors: survey, Na1s, Mg2p, P2p and O1s.

**Table S4** Chemical analysis based on the XPS results for the NMP:<sub>0.030</sub>Eu<sup>2+</sup>-MPQ and NMP:<sub>0.025</sub>Eu-arc phosphors.

| Elements | Level | Atomic concentration (%)     |                              |
|----------|-------|------------------------------|------------------------------|
|          |       | NMP: <sub>0.030</sub> Eu-MPQ | NMP: <sub>0.025</sub> Eu-arc |
| Na       | 1s    | 18.89                        | 15.74                        |
| Eu       | 3d    | 0.55                         | 0.30                         |
| Mg       | 2p    | 13.59                        | 14.76                        |
| P        | 2p    | 14.83                        | 16.55                        |
| O        | 1s    | 52.14                        | 52.65                        |

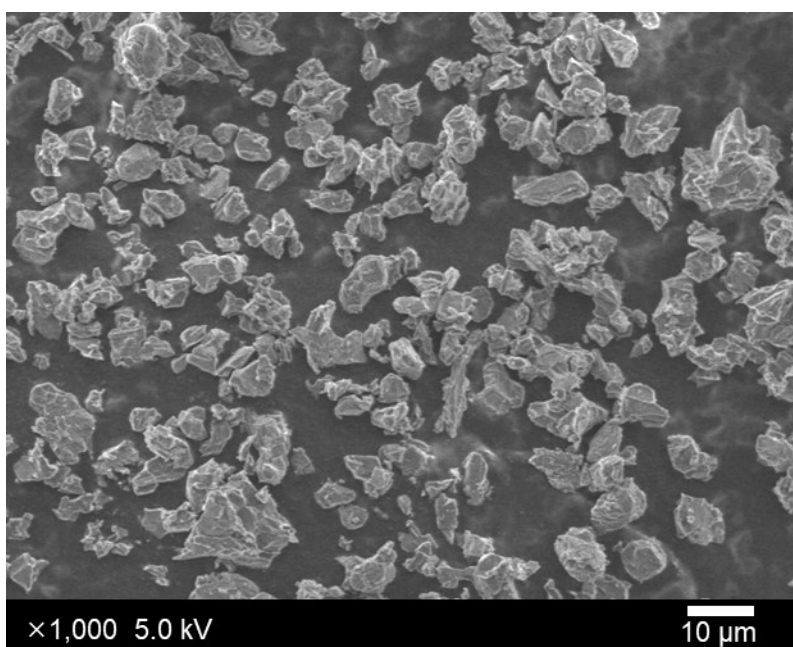

**Figure S8** FE-SEM image of the olivine-type NMP:<sub>0.025</sub>Eu-arc phosphor.



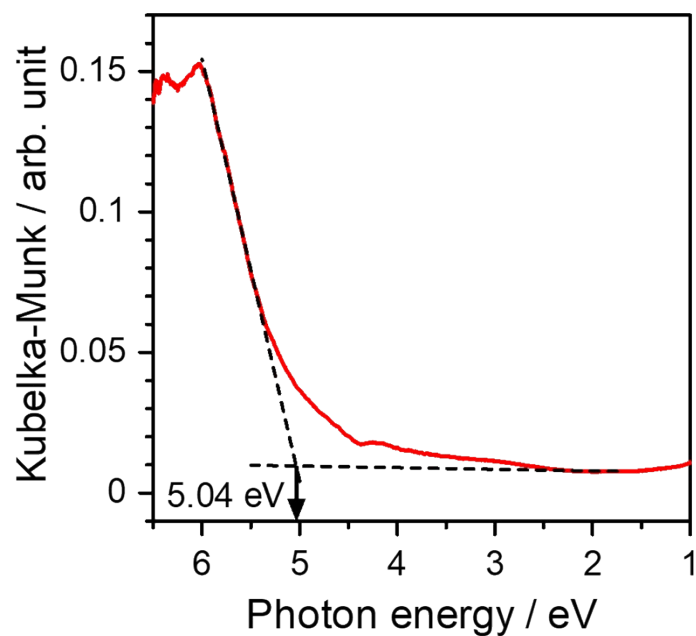

**Figure S9** Plot of the Kubelka-Munk function for the NMP host.

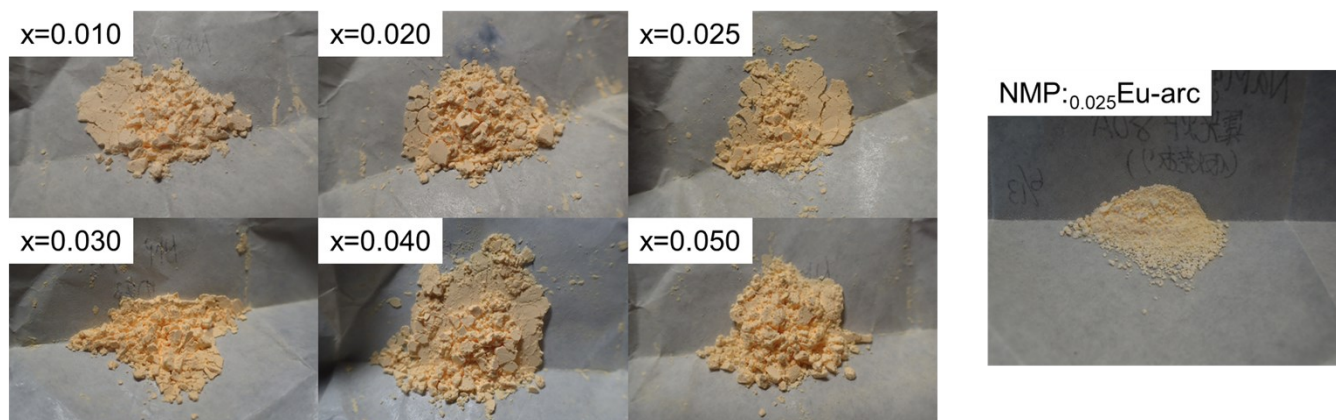

**Figure S10** Photographs of the non-excited  $\text{NMP}:_x\text{Eu}^{2+}\text{-MPQ}$  ( $x=0.010\text{-}0.050$ ) and  $\text{NMP}:_{0.025}\text{Eu-arc}$  phosphors (under fluorescent lamps).

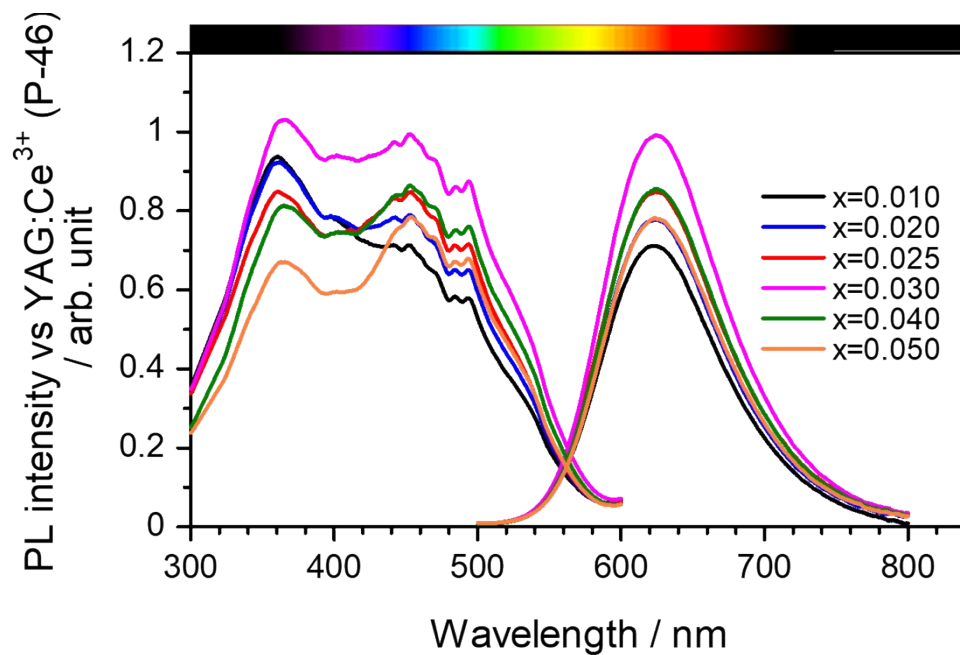

**Figure S11** (A) PL and PLE spectra and (B) plot of the PL intensity for the NMP: $x$ Eu<sup>2+</sup>-MPQ ( $x=0.010$ - $0.050$ ) phosphors.

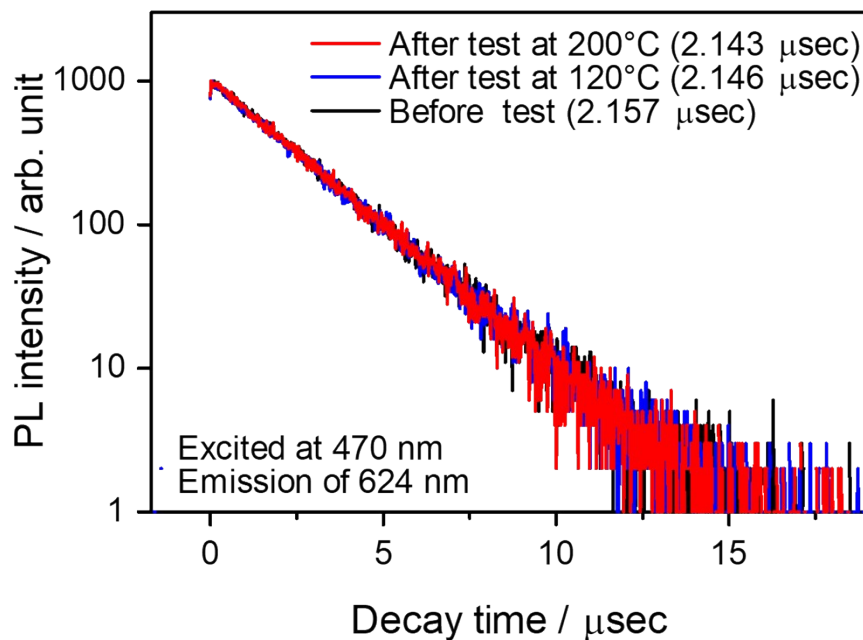

**Figure S12** PL decay curves for the NMP:<sub>0.030</sub>Eu<sup>2+</sup>-MPQ phosphors before and after the humidity test.
